# Supplementary material for: Small molecule activation by mixed methyl/methylidene rare earth metal complexes
Source: Royal Society of Chemistry journal article supplement (doi:10.1039/c6dt00314a), 2016-01-01
Supplement: c6dt00314a1.pdf [file c6dt00314a1.pdf]

## Supporting Information

### Small Molecules Activation by Mixed Methyl/Methylidene Rare Earth Metal Clusters

Jianquan Hong, Zhenhua Li, Zhening Chen, Linhong Weng, Xigeng Zhou,\* and Lixin Zhang\*

## Experimental Section

**General Procedures and Materials.** All manipulations were performed with rigorous exclusion of air and water, using Schlenk techniques or a Mbraun glovebox (Unilab Mbraun; <1 ppm O<sub>2</sub>, <1 ppm H<sub>2</sub>O). Toluene, THF and hexane were distilled from sodium strip/benzophenone ketyl, degassed, dried over fresh Na chips and stored in the glovebox. Bis(2,6-Diisopropylphenyl)carbodiimide were obtained from Tokyo Chemical Industry Co., Ltd and used without purification. CH<sub>3</sub>C<sub>6</sub>H<sub>4</sub>NMe<sub>2</sub>-*o*, *n*BuLi (1.6 mol/L in hexane), PhLi (2.0 mol/L in dibutyl ether) and AlMe<sub>3</sub> (1 mol/L in heptane) were purchased from ACROS and used without purification. Phenylacetylene and TMSC≡CH were obtained from J & K and dried by 4Å molecular sieve. Benzonitrile was purchased from ACROS and dried by CaCl<sub>2</sub>. C<sub>6</sub>D<sub>6</sub> was obtained from Cambridge Isotope and dried by sodium chips. CS<sub>2</sub> was obtained from ALFA AESAR and dried by CaH<sub>2</sub>. LnCl<sub>3</sub><sup>[1]</sup> and [(NCN<sup>diipp</sup>)Ln(CH<sub>2</sub>C<sub>6</sub>H<sub>4</sub>NMe<sub>2</sub>-*o*)<sub>2</sub>] (Ln = Er, Y, Lu)<sup>[2]</sup> were prepared according to literature procedure. <sup>1</sup>H NMR and <sup>13</sup>C NMR spectra were recorded on a JEOL ECA-400 NMR spectrometer (FT, 400 MHz for <sup>1</sup>H; 100 MHz for <sup>13</sup>C) in C<sub>6</sub>D<sub>6</sub> at room temperature.

### Characterization of complexes 2-5.

#### 1. NMR spectra of representative complexes

The solid samples were dissolved in C<sub>6</sub>D<sub>6</sub>, and then transferred into a J-Young NMR tube in the glove-box. <sup>1</sup>H NMR and <sup>13</sup>C NMR spectra were recorded on a JEOL ECA-400 NMR spectrometer (FT, 400 MHz for <sup>1</sup>H; 100 MHz for <sup>13</sup>C) in C<sub>6</sub>D<sub>6</sub> at room temperature.

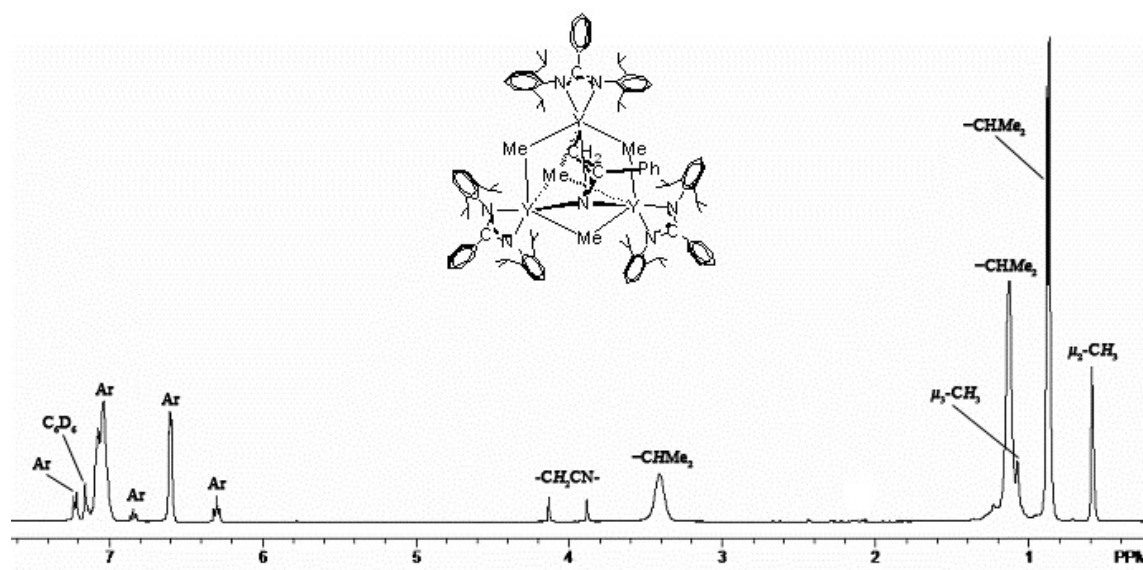

**Figure S1.**  $^1\text{H}$  NMR spectrum of **2a** obtained in  $\text{C}_6\text{D}_6$  at room temperature.

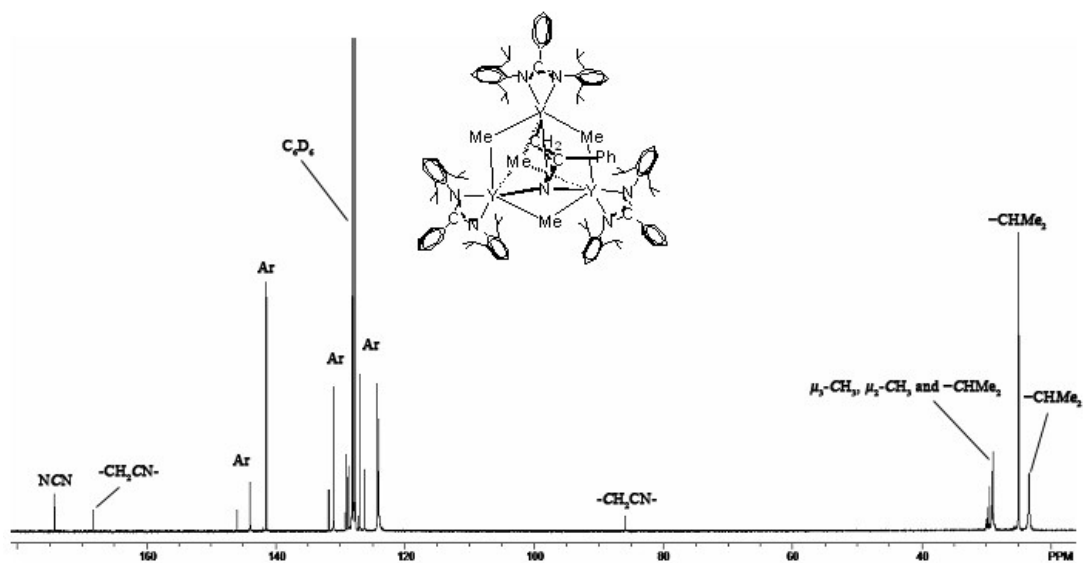

**Figure S2.**  $^{13}\text{C}$  NMR spectrum of **2a** obtained in  $\text{C}_6\text{D}_6$  at room temperature.

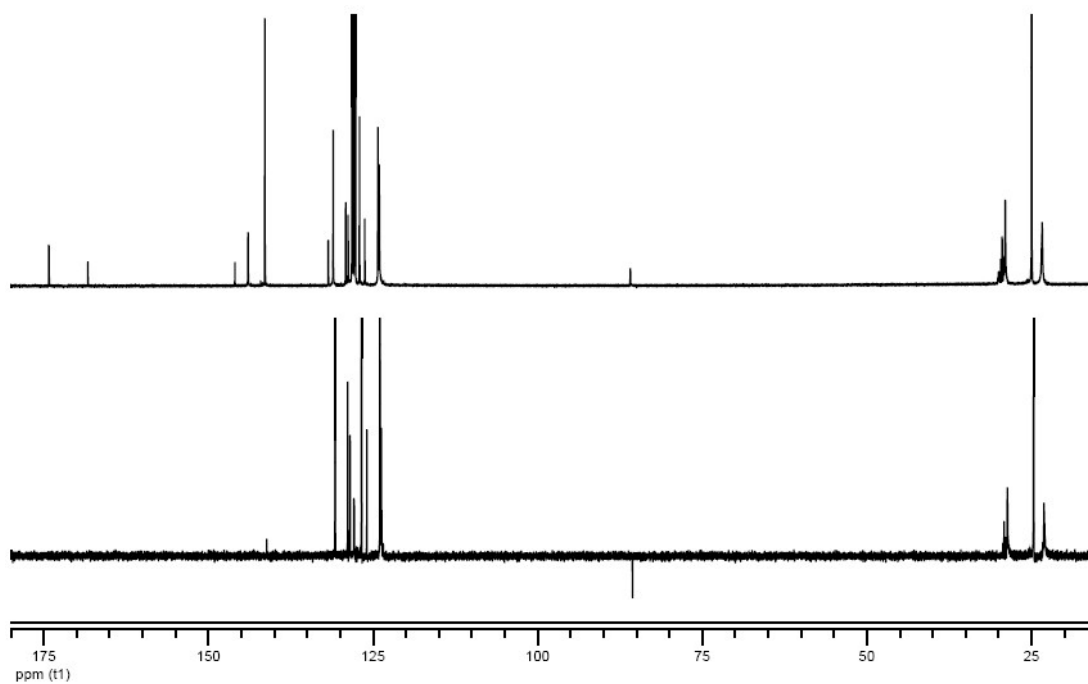

**Figure S3.**  $^{13}\text{C}$  and  $^{13}\text{C}$  DEPT-135 spectrum of complex **2a**.

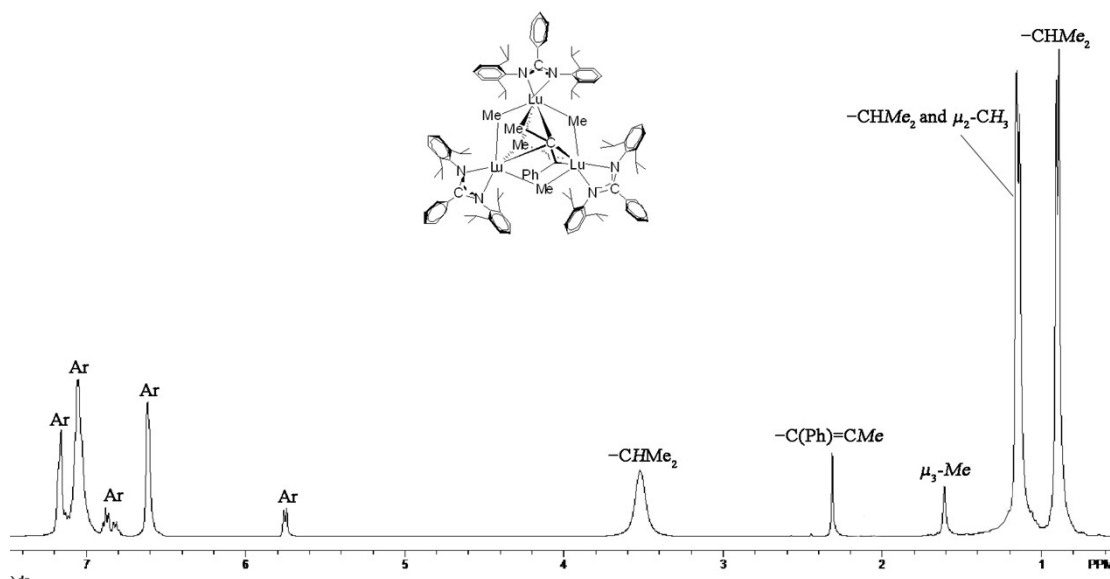

**Figure S4.**  $^1\text{H}$  NMR spectrum of **3b** obtained in  $\text{C}_6\text{D}_6$  at room temperature.

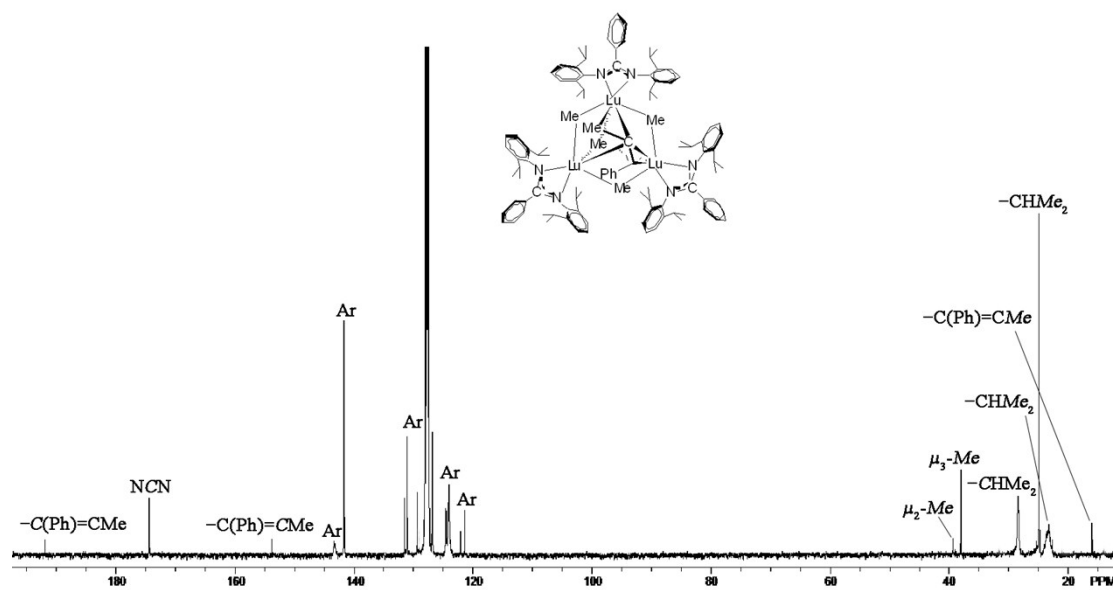

**Figure S5.**  $^{13}\text{C}$  NMR spectrum of **3b** obtained in  $\text{C}_6\text{D}_6$  at room temperature.

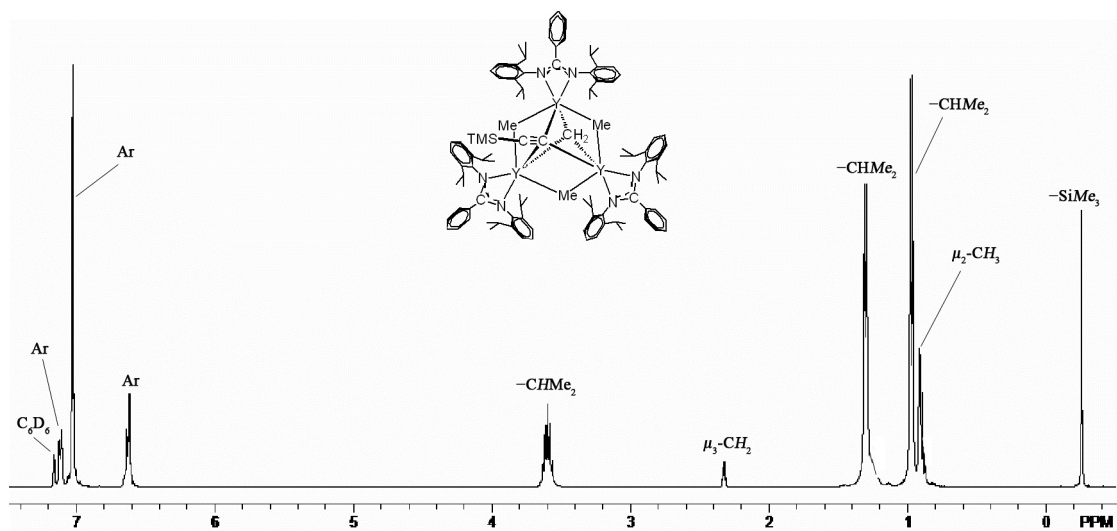

Figure S6.  $^1\text{H}$  NMR spectrum of **4a** obtained in  $\text{C}_6\text{D}_6$  at room temperature.

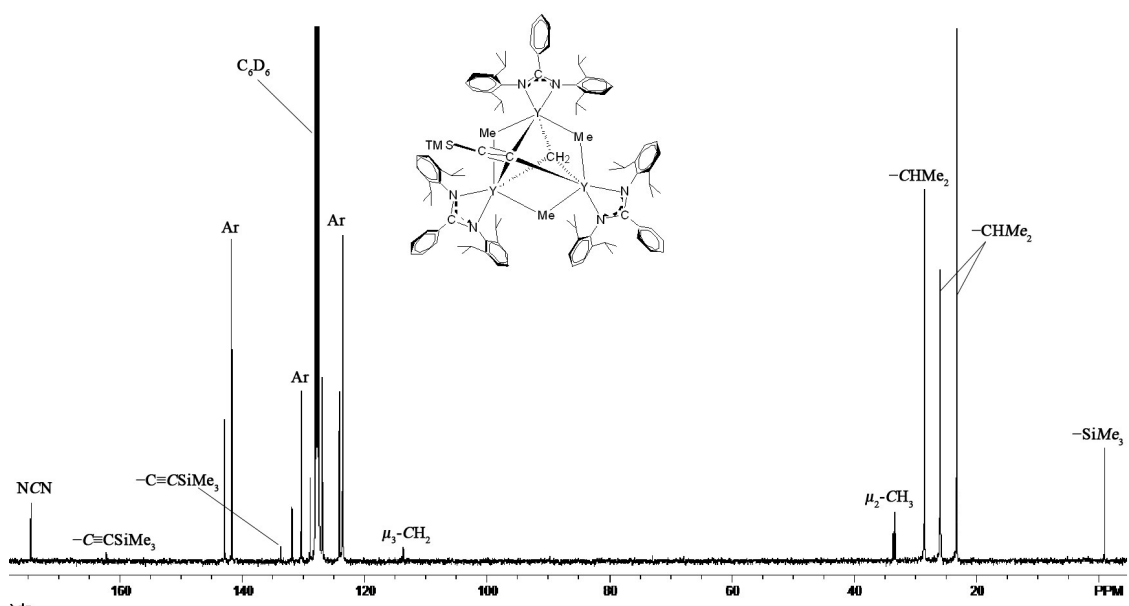

Figure S7.  $^{13}\text{C}$  NMR spectrum of **4a** obtained in  $\text{C}_6\text{D}_6$  at room temperature.

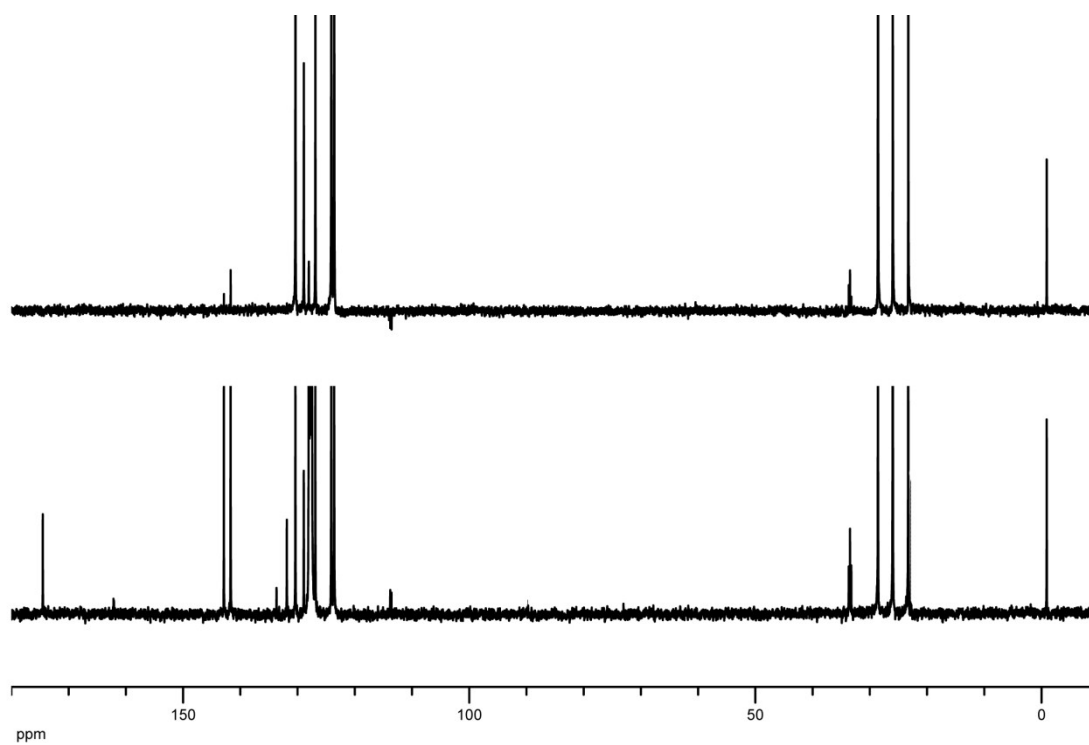

Figure S8.  $^{13}\text{C}$  DEPT-135 and  $^{13}\text{C}$  spectrum of complex **4a**.

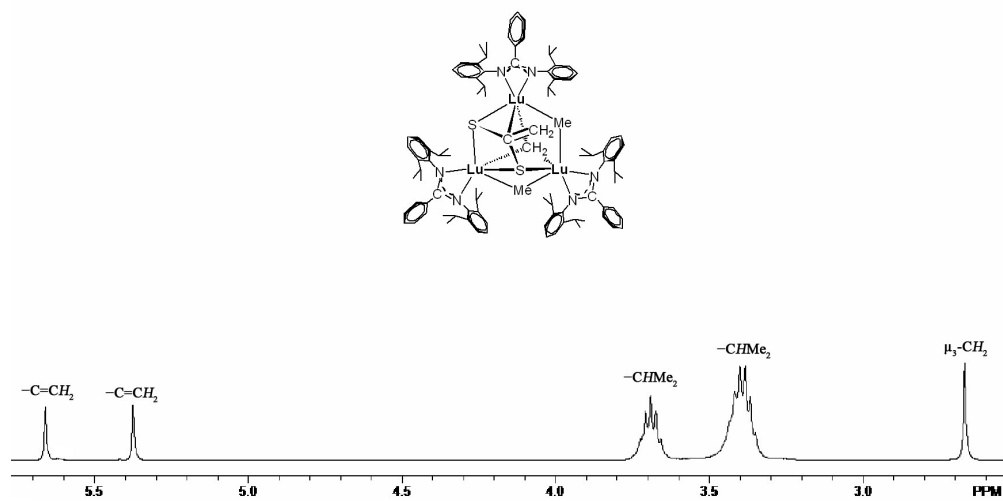

Figure S9.  $^1\text{H}$  NMR spectrum of **5b**: resonance of  $-\text{C}=\text{CH}_2$ ,  $-\text{CHMe}_2$  and  $\mu_3\text{-CH}_2$  protons

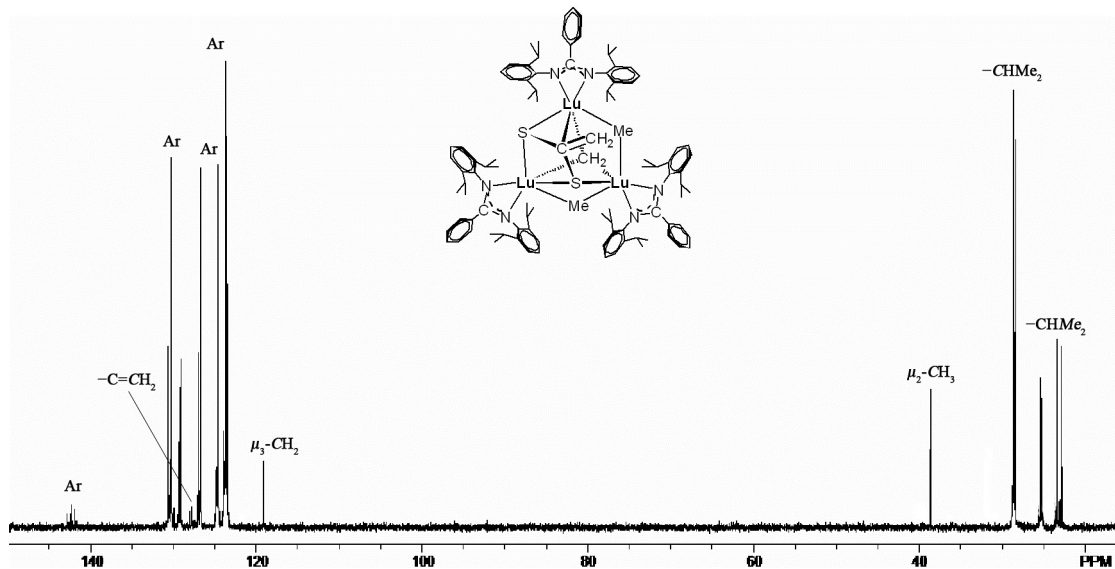

Figure S10.  $^{13}\text{C}$  DEPT-45 spectrum of **5b** obtained in  $\text{C}_6\text{D}_6$  at room temperature.

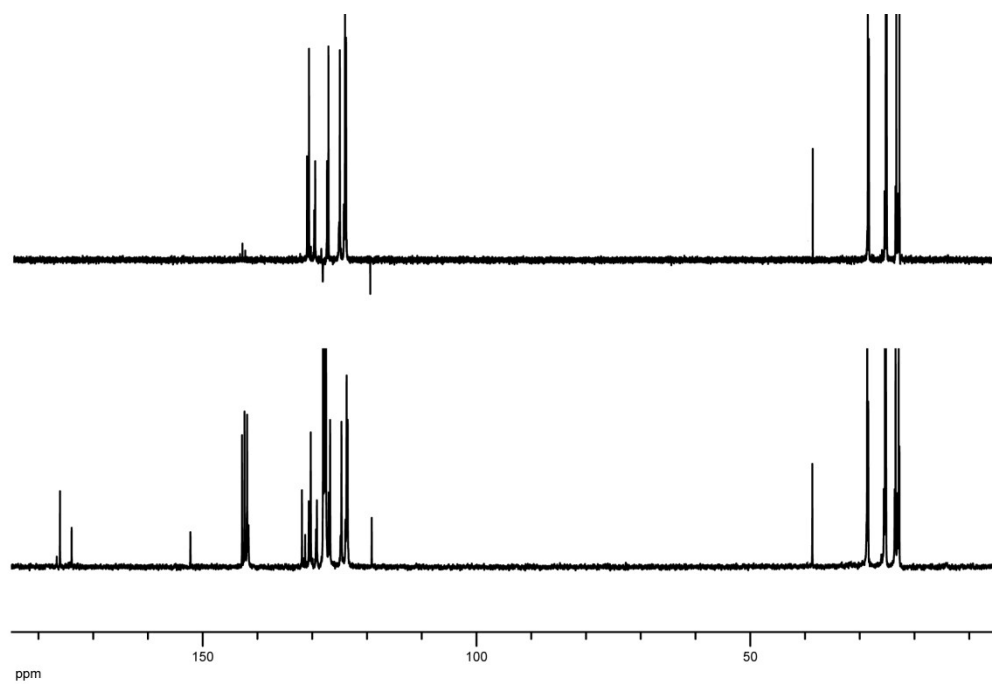

Figure S11.  $^{13}\text{C}$  DEPT-135 and  $^{13}\text{C}$  spectrum of complex **5b**.

**X-ray Crystallographic Analysis.** Suitable crystals were sealed in the thin-wall glass capillaries under a microscope in the glove box. Data collections were performed on a Bruker SMART APEX diffractometer with CCD area detector using graphite-monochromated Mo K $\alpha$  radiation ( $\lambda = 0.71073 \text{ \AA}$ ). The determination of crystal class and unit cell was carried out by SMART program package. The raw frame data were processed using SAINT<sup>[3]</sup> and SADABS<sup>[4]</sup> to yield the reflection data file. The structure was solved by using SHELXTL program<sup>[5]</sup>. Refinement was performed on  $F^2$  anisotropically by the full-matrix least-squares method for all the non-hydrogen atoms. The analytical scattering factors for neutral atoms were used throughout the analysis. Except for the hydrogen atoms on bridging-carbons, hydrogen atoms were placed at the calculated positions and included in the structure calculation without further refinement of the parameters. The hydrogen atoms on bridging-carbons were located by difference Fourier syntheses and their coordinates and isotropic parameters were refined. The residual electron densities were of no chemical significance. CCDC 1405778 (complex **1c**), 845812 (complex **2a**), 845817 (complex **3b**), 845815 (complex **4a**) and 845816 (complex **5b**) contain the supplementary crystallographic data for this paper. These data can be obtained free of charge via [www.ccdc.cam.ac.uk/conts/retrieving.html](http://www.ccdc.cam.ac.uk/conts/retrieving.html) (or from The Cambridge Crystallographic Data Centre, 12, Union Road, Cambridge CB2 1EZ, UK; fax: (+44)-1223-336033; or [deposit@ccdc.cam.ac.uk](mailto:deposit@ccdc.cam.ac.uk)).

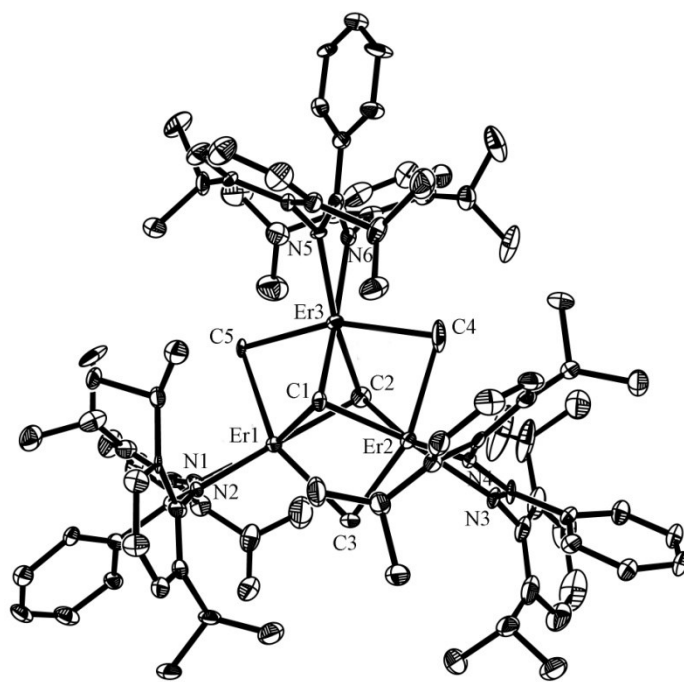

**Figure S12.** Molecular structure of **1c** (thermal ellipsoids at 30% level; solvent molecules and hydrogen atoms are omitted for clarity).

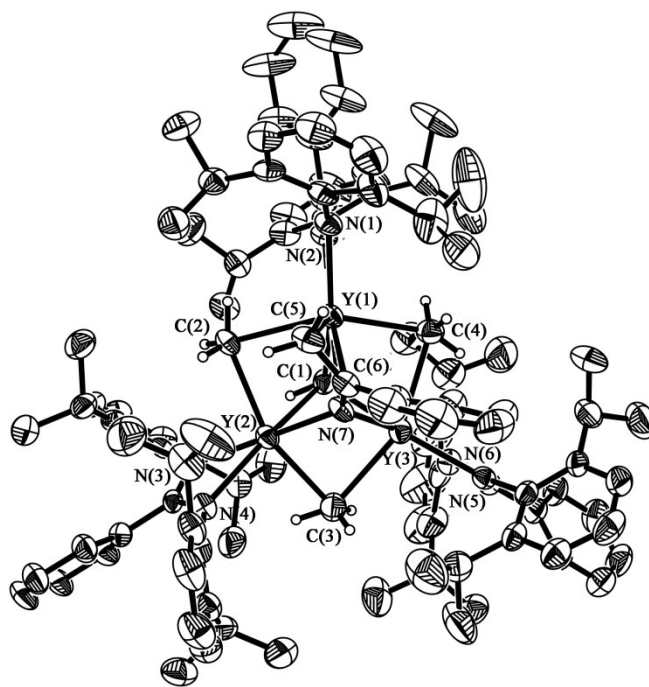

**Figure S13.** Molecular structure of **2a** (thermal ellipsoids at 30% level; solvent molecules and parts of hydrogen atoms are omitted for clarity).



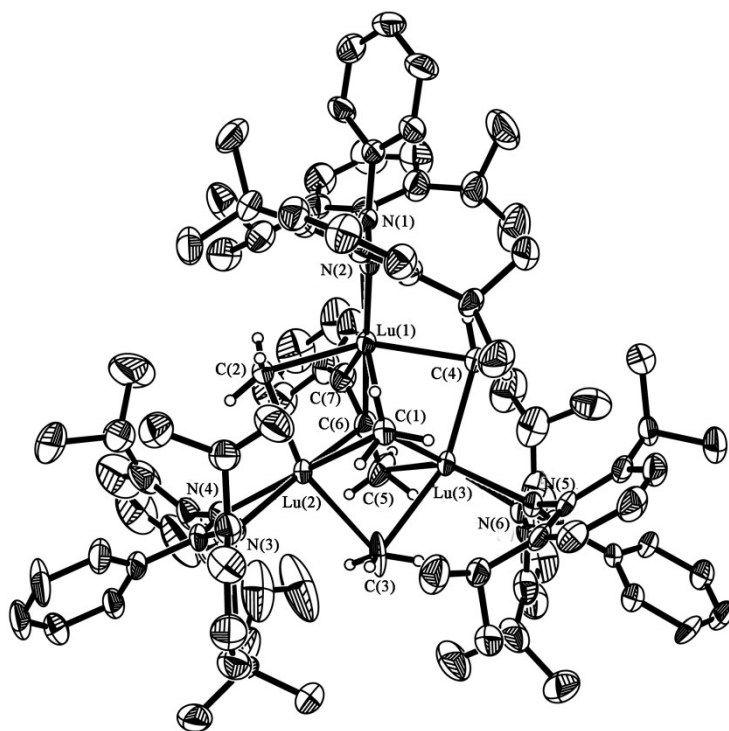

**Figure S14.** Molecular structure of **3b** (thermal ellipsoids at 30% level; solvent molecules and parts of hydrogen atoms are omitted for clarity).

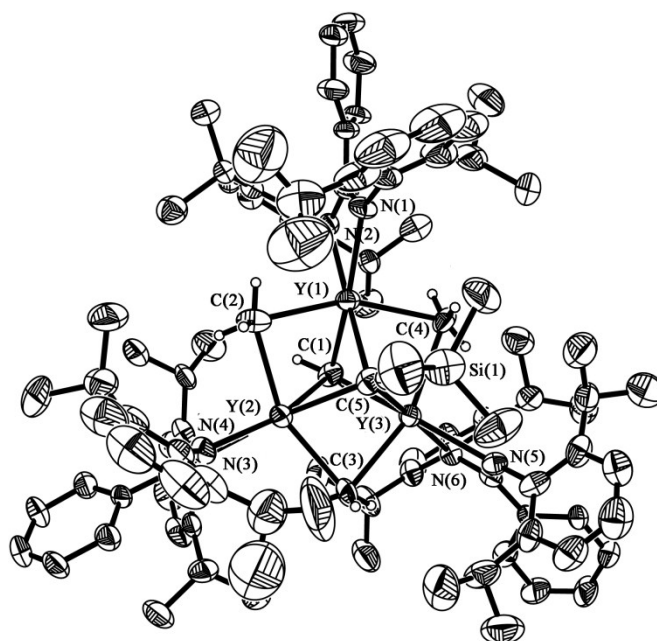

**Figure S15.** Molecular structure of **4a** (thermal ellipsoids at 30% level; solvent molecules and parts of hydrogen atoms are omitted for clarity).

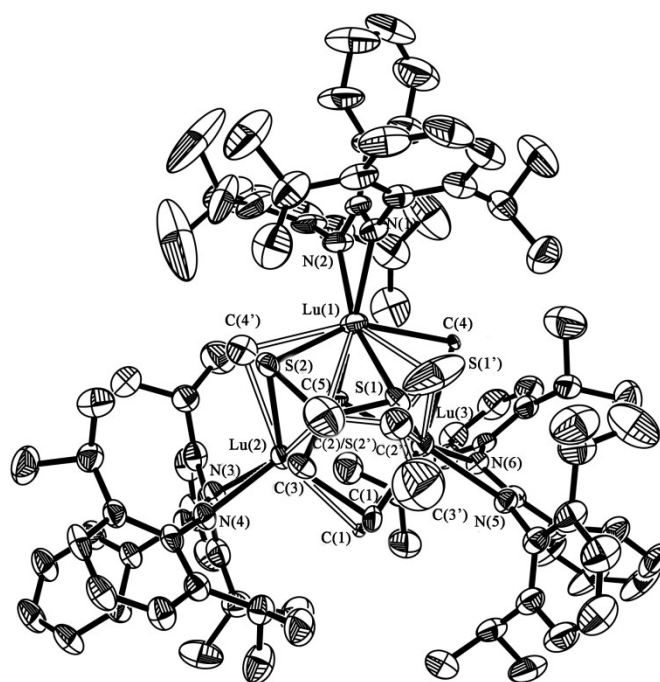

**Figure S16.** Molecular structure of **5b** (thermal ellipsoids at 30% level; solvent molecules and hydrogen atoms are omitted for clarity).

#### References

1. R. W. Stotz, G. A. Melson, *Inorg. Chem.*, 1972, **11**, 1720-1721.
2. (a) L. Zhang, M. Nishiura, M. Yuki, Y. Luo, Z. Hou, *Angew. Chem. Int. Ed.*, 2008, **47**, 2642–2645; (b) M. Nishiura, Z. Hou, *Nat. Chem.*, 2010, **2**, 257-268.
3. *SAINTPlus Data Reduction and Correction Program* v. 6.02 a; Bruker AXS: Madison, WI, 2000.
4. Sheldrick, G. M. *SADABS*, A Program for Empirical Absorption Correction; University of Göttingen: Göttingen, Germany, 1998.
5. Sheldrick, G. M. *SHELXL-97*, Program for the Refinement of Crystal Structures; University of Göttingen: Göttingen, Germany, 1997.
